# Supplementary material for: Quantitation of the latent HIV-1 reservoir from the sequence diversity in viral outgrowth assays
Source: PubMed Central journal article supplement (PMC6034329; doi:10.1186/s12977-018-0426-1), 2018-07-05

**Patient 106**

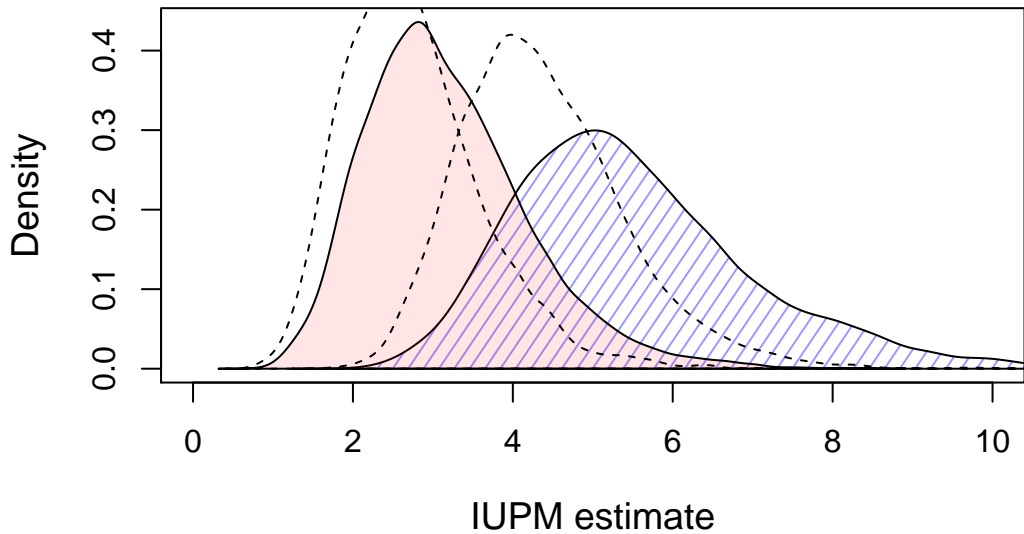

**Patient 111**

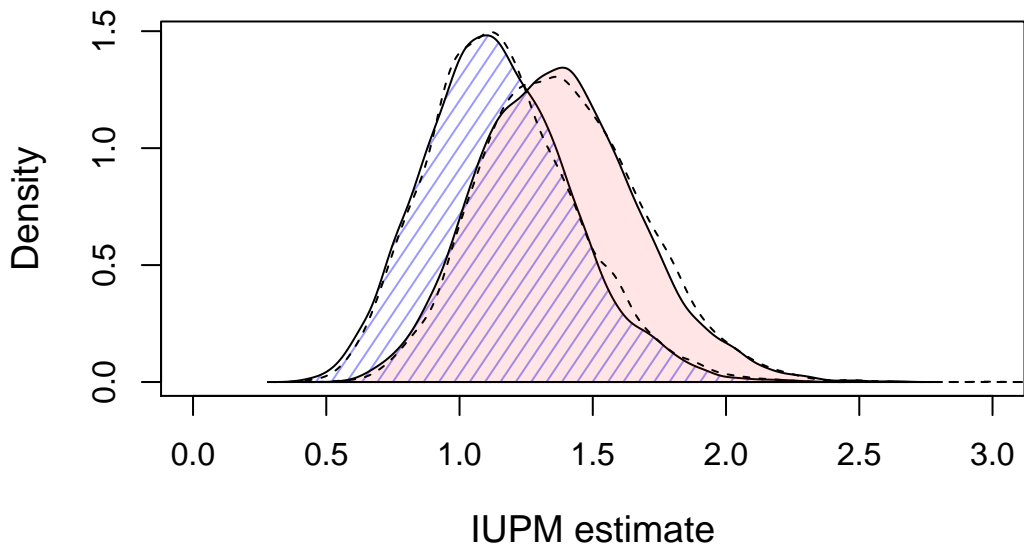

Supplement: 12977_2018_426_MOESM2_ESM.pdf [file 12977_2018_426_MOESM2_ESM.pdf]
